# Supplementary material for: Positive Effects of Organic Amendments on Soil Microbes and Their Functionality in Agro-Ecosystems
Source: MDPI journal article supplement (doi:10.3390/plants12223790), 2023-11-07
Supplement: s1 [file s1]

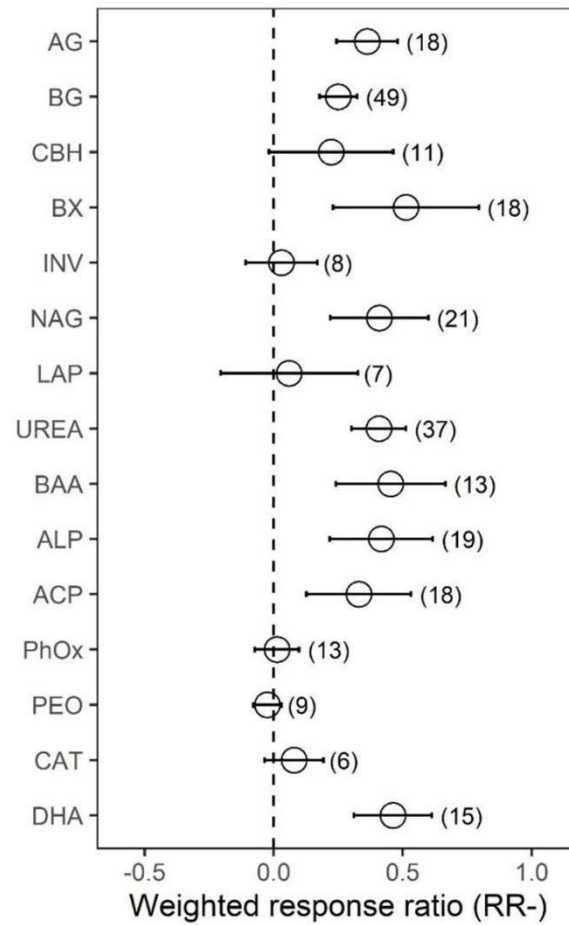

**Figure S1.** The effect of replacing chemical fertilizer with organic amendments on soil enzyme activities response ratio (natural logarithm-transformed ratio of organic amendments to chemical treatments, RR). The circles with error bars denote the overall mean response ratio and 95% CI, respectively. The number of observations are detailed beside each attribute with parentheses. AG, BG, CBH, BX, INV, NAG, LAP, UREA, BAA, ALP, ACP, PhOx, PEO, CAT and DHA represent  $\alpha$ -1,4-glucosidase,  $\beta$ -1,4-glucosidase,  $\beta$ -D-cellobiosidase,  $\beta$ -1,4-xylosidase, invertase,  $\beta$ -1,4 N-Acetyl-glucosaminidase, leucine aminopeptidase, urease, protease, alkaline phosphatase, acid phosphatase, phenol oxidase, peroxidase, catalase and dehydrogenase, respectively.

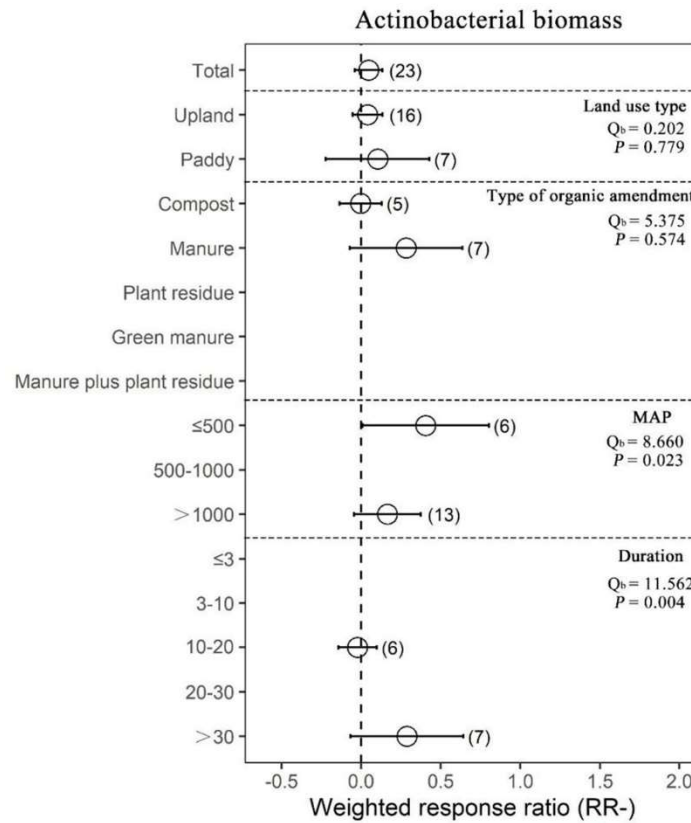

**Figure S2.** The effect of replacing chemical fertilizer with organic amendments on actinobacterial biomass response ratio (natural logarithm-transformed ratio of organic amendments to chemical treatments, RR). The circles with error bars denote the overall mean response ratio and 95% CI, respectively. The number of observations are detailed beside each attribute with parentheses. The MAP and Duration denotes for mean annual precipitation (mm) and experimental duration (year), respectively.  $Q_b$  denotes for between-group heterogeneity in same variable and there is significant difference between groups when  $P < 0.05$ .
