# Supplementary material for: Positive Effects of Organic Amendments on Soil Microbes and Their Functionality in Agro-Ecosystems
Source: Plants (Basel). 2023 Nov 7;12(22):3790. doi: 10.3390/plants12223790 (PMC10674390; doi:10.3390/plants12223790)
Supplement: Supplementary file 1 [file plants-12-03790-s001.zip › dataset.csv]

observation	Author	Publication1	Country	Latitude	Longtitud	sand	silt	clay	FER	Fertilizer detail	Fertilizer regime	depth	establish year	End year	MAT	MAP	Initial pH	Initial SOC	Initial TN	Organic type	Biome	Duration	OR	pH	pH-Var	SOC	SOC-Var	TN	TN-Var	AN	AN-Var	TP	TP-Var	AP	AP-Var	TK	TK-Var	AK	AK-Var	MBC	MBC-Var	C/N	C/N-Var	DOC	DOC-Var	Yield	Yield-Var	Total biomass	Total biomass-Var
1	Zhong et al., 2010	The effects of mineral fertilizer and organic manure on soil microbial community and diversity	China	28.26	116.34				NPK+compost	compost pig manure	COF	0-20	1986	2007	17.5	1537	5.36	8.59	1	compost	upland	21	2	0.06	0.000134496	0.091854001	0.00084483	0.068467799	0.000204022	0.10528041	0.000268867	0.502091944	0.00153685	0.555946059	0.00034095	0.212984929	0.000625475	0.300127675	7.02E-05							0.289532212	0.001472839	0.176256937	0.040276903
2	Zhong et al., 2010	The effects of mineral fertilizer and organic manure on soil microbial community and diversity	China	28.26	116.34				compost	compost pig manure	OF	0-20	1986	2007	17.5	1537	5.36	8.59	1	compost	upland	21	2	0.04	0.000178869	0.002644338	0.000303701	-0.015873349	0.000378	0.023277118	0.00031835	0.448024723	0.000994502	0.523058192	0.000184374	-0.013878403	0.000106278	0.023939872	8.32E-05							0.181549654	0.001371876	0.126964134	0.025798767
3	Padhan et al 2020	Soil N transformation as modulated by soil microbes in a 44 years long term fertilizer experiment in a sub-humid to humid Alfisol	India	32.1	76.05	29	47	24	NPK+manure	farmyard manure	COF	0-15	1972	2017	20.7	2600	5.8	7.92		manure	upland	44	5	0.4	0.003331937	0.139701301	0.005573939	0.035401927	0.010264054	0.163779755	0.009622282									0.260643062	0.00957825							-0.056464234	0.005275774
4	Zhu et al 2019	Effects of reduced inorganic fertilization and rice straw recovery on soil enzyme activities and bacterial community in double-rice paddy soils	China	28.14	113.2				NPK+plant residue	rice straw	COF	0-20	2007	2016	17.1	1500	5.2	17.6	1.99	plant residue	paddy	9	6.75	-0.02	0.00032696	-0.029519495	0.005573939	-0.020965128	0.001005386			-0.065240522	0.013937569	-0.233704517	0.144958991	-0.006740517	0.000225394	0.147644116	0.03265371	-0.212930697	0.015450609
5	Zhang et al 2019	Effect of different fertilization practices on soil microbial community in a wheat�Cmaize rotation system	China	36.7	114.9				NPK+manure	manure	COF	0-20	2011	2013	13.2	494		7.9	0.9	manure	upland	2	6	0.29	0.000107882	-0.032223732	0.005573939							0.165486454	0.006390969													0.002355714	0.00058606
6	Zhang et al 2019	Effect of different fertilization practices on soil microbial community in a wheat�Cmaize rotation system	China	36.7	114.9				NPK+plant residue	wheat straw	COF	0-20	2011	2013	13.2	494		7.9	0.9	plant residue	upland	2	11.03	0.12	9.47E-05	0.002262444	0.005573939							-0.068914252	0.003625751													0.111473866	0.014765292
7	Zhang et al 2019	Effect of different fertilization practices on soil microbial community in a wheat�Cmaize rotation system	China	36.7	114.9				NPK+manure plus plant residue	manure and wheat straw	COF	0-20	2011	2013	13.2	494		7.9	0.9	manure plus plant residue	upland	2	28.1	0.19	0.000131187	0.07838614	0.005573939							0.282439958	0.006063264													0.255629006	0.002949067
8	Yang et al 2019	Functional Soil Organic Matter Fractions, Microbial Community and Enzyme Activities in a Mollisol Under 35 Years Manure and Mineral Fertilization	China	45.67	126.58				NPK+manure	manure	COF	0-10	1979	2014	3.5	533	7.22	26.7	1.47	manure	upland	35	18.6																									0.498827326	0.036570071
9	Yang et al 2019	Functional Soil Organic Matter Fractions, Microbial Community and Enzyme Activities in a Mollisol Under 35 Years Manure and Mineral Fertilization	China	45.67	126.58				manure	manure	OF	0-10	1979	2014	3.5	533	7.22	26.7	1.47	manure	upland	35	18.6																									0.108566381	0.051624735
10	Dai et al., 2019	Soil C/N and pH together as a comprehensive indicator for evaluating the effects of organic substitution management in subtropical paddy fields after application of high-quality amendments	China	28.57	115.93				NPK+green manure plus manure	milk vetch and pig manure	COF	0-20	1984	2018	18.4	1632	6.5	8.58	1.36	green manure plus manure	paddy	34	3.164	0.38	0.06163703			0.185938197	0.00373688	0.385097805	0.009622282			0.648466209	0.019656413			-0.18366474	0.024687314							0.112064167	0.009575021	0.029806016	0.018389409
11	Dai et al., 2019	Soil C/N and pH together as a comprehensive indicator for evaluating the effects of organic substitution management in subtropical paddy fields after application of high-quality amendments	China	28.57	115.93				NPK+green manure plus manure	milk vetch and pig manure	COF	0-20	1984	2018	18.4	1632	6.5	8.58	1.36	green manure plus manure	paddy	34	5.273	0.54	0.061341236			0.298492989	0.001821046	0.799213093	0.009622282			0.954217784	0.015183722			-0.106106506	0.015873742							0.087688546	0.011016854	0.137839014	0.018389409
12	Dai et al., 2019	Soil C/N and pH together as a comprehensive indicator for evaluating the effects of organic substitution management in subtropical paddy fields after application of high-quality amendments	China	28.57	115.93				NPK+green manure plus manure	milk vetch and pig manure	COF	0-20	1984	2018	18.4	1632	6.5	8.58	1.36	green manure plus manure	paddy	34	7.482	0.71	0.061019934			0.411245471	0.001920706	0.760391212	0.009622282			0.808873949	0.016423035			0.014987791	0.028011836							0.107207709	0.010000719	0.037522645	0.018389409
13	Liu et al., 2018	Soil pH rather than nutrients drive changes in microbial community following long-term fertilization in acidic Ultisols of southern China	China	26.75	111.88				NPK+compost	compost pig manure	COF	0-20	1990	2014	18.3	1300	5.7	6.06	1.07	compost	upland	24	11.5	1.84	6.29E-05	0.312984255	0.000277613	0.415827895	0.004509983	0.25277943	0.000300305	0.621403276	0.000321274	0.881787936	0.000573792	-0.077013988	0.000313172	0.751987681	0.001810261
14	Kuppusamy et al., 2018	Agriculturally relevant microbial community structure in long-term fertilized paddy soils as revealed by phospholipid fatty acid (PLFA) and pyrosequencing analyses	Korea	35.5	128.75				NPK+compost	compost (straw and cattle manure)	COF	0-15	1967	2012	14.4	1085				compost	paddy	45	10	-0.1	1.33E-05	0.295229278	0.0001905	0.328504067	0.000765449			0.336472237	0.003466667			0.034486176	0.000379336									0.189414848	1.39E-06	0.380001271	0.000225842
15	Kuppusamy et al., 2018	Agriculturally relevant microbial community structure in long-term fertilized paddy soils as revealed by phospholipid fatty acid (PLFA) and pyrosequencing analyses	Korea	35.5	128.75				compost	compost (straw and cattle manure)	OF	0-15	1967	2012	14.4	1085				compost	paddy	45	10	0	0.0196	0.175564774	0.0196	0.287682072	0.001337449			0.182321557	0.000966667			0.017391743	0.000388961									0.058983719	3.33E-06	0.39830423	0.000223266
16	Wei et al., 2017	35 years of manure and chemical fertilizer application alters soil microbial community composition in a Fluvo-aquic soil in Northern China	China	34.27	117.28				NPK+compost	compost (horse manure or cattle manure)	COF	0-20	1985	2015	14	1870	8.01	6.26	0.66	compost	upland	35	37.5	0.14	0.003331937	0.506257801	0.005573939	0.512951023	0.010264054	0.073063722	0.009622282	0.458457638	0.008666061	1.809987711	0.018728126			0.387271816	0.017420247			-0.012391732	0.004629345					0.43949421	0.018389409
17	Wei et al., 2017	35 years of manure and chemical fertilizer application alters soil microbial community composition in a Fluvo-aquic soil in Northern China	China	34.27	117.28				compost	compost (horse manure or cattle manure)	OF	0-20	1985	2015	14	1870	8.01	6.26	0.66	compost	upland	35	37.5	0.23	0.003331937	0.234125968	0.005573939	0.300892304	0.010264054	0.172763082	0.009622282	0.243346259	0.008666061	1.424613225	0.018728126			0.054060227	0.017420247			-0.071458964	0.004629345					0.301630264	0.018389409
18	Schmidt et al., 2015; Schmidt et al., 2017	Effects of plant-symbiotic relationships on the living soil microbial community and microbial necromass in a long-term agro-ecosystem	Germany	51.95	11.69	11.2	67.8	21	NPK+manure	farmyard manure	COF	0-20	1924	2011	8.8	480				manure	upland	87	10	0.41	0.003331937	0.217723484	0.005573939	0.302280872	0.010264054	-0.048790164	0.009622282									0.770924882	0.00957825
19	Schmidt et al., 2015; Schmidt et al., 2017	Effects of plant-symbiotic relationships on the living soil microbial community and microbial necromass in a long-term agro-ecosystem	Germany	51.95	11.69	11.2	67.8	21	NPK+manure	farmyard manure	COF	0-20	1924	2011	8.8	480				manure	upland	87	15	0.26	0.003331937	0.293072921	0.005573939	0.344840486	0.010264054	0.234072622	0.009622282									0.808967507	0.00957825
20	Schmidt et al., 2015; Schmidt et al., 2017	Effects of plant-symbiotic relationships on the living soil microbial community and microbial necromass in a long-term agro-ecosystem	Germany	51.95	11.69	11.2	67.8	21	manure	farmyard manure	OF	0-20	1924	2011	8.8	480				manure	upland	87	10	-0.29	0.003331937	0.057758834	0.005573939	0.111225635	0.010264054	0.338563194	0.009622282									-0.095604341	0.00957825
21	Schmidt et al., 2015; Schmidt et al., 2017	Effects of plant-symbiotic relationships on the living soil microbial community and microbial necromass in a long-term agro-ecosystem	Germany	51.95	11.69	11.2	67.8	21	manure	farmyard manure	OF	0-20	1924	2011	8.8	480				manure	upland	87	15	0.1	0.0084	0.222061885	0.005573939	0.302280872	0.010264054	0.488602487	0.009622282									0.906240396	0.00957825
22	Liu ZJ et al 2017	Effects of inorganic and organic amendment on soil chemical properties, enzyme activities, microbial community and soil quality in yellow clayey soil	China	30.85	113.12				NPK+green manure	green manure	COF	0-20			21	1179	6.3	11.57	0.74	green manure	paddy	2	22.5	0.02	0.000134373	0.013667639	0.036615572	0.021978907	0.031758449	0.185900528	0.014052052			0.045993783	0.063404467			0.192783331	0.009789571	-0.037457563	0.016605969							0.201298806	0.079939193
23	Liu ZJ et al 2017	Effects of inorganic and organic amendment on soil chemical properties, enzyme activities, microbial community and soil quality in yellow clayey soil	China	30.85	113.12				NPK+compost	compost pigmanure	COF	0-20	2012	2012	21	1179	6.3	11.57	0.74	compost	paddy	2	3.85	0.03	0.000134083	0.090293447	0.026516786	0.085157808	0.049673427	0.149299122	0.014354878			0.318453731	0.292063535			0.184516474	0.02259594	0.038466281	0.017574513							0.040631587	0.026802613
24	Liu ZJ et al 2017	Effects of inorganic and organic amendment on soil chemical properties, enzyme activities, microbial community and soil quality in yellow clayey soil	China	30.85	113.12				NPK+plant residue	rice straw	COF	0-20	2012	2012	21	1179	6.3	11.57	0.74	plant residue	paddy	2	3	-0.04	0.001144331	0.132556147	0.035722083	0.064538521	0.233748285	0.159894078	0.013514352			0.239065504	0.057404701			0.194980513	0.069577653	0.021819047	0.01787582							0.205342441	0.023362604
25	Yue et al., 2016	Manure substitution of mineral fertilizers increased functional stability through changing structure and physiology of microbial communities	China	28.62	116.43				NPK+manure	pig manure	COF	0-20	1980	2008	17.5	1727	6	9.4	1	manure	upland	28	15	1.4	0.003331937	0.345361184	0.005573939	0.336472237	0.010264054	0.538678384	0.009622282	0.916290732	0.008666061	1.622860933	0.018728126	-0.015873349	0.001073284	0.304401114	0.017420247	0.323996883	0.00957825							0.27280893	0.018389409
26	Yue et al., 2016	Manure substitution of mineral fertilizers increased functional stability through changing structure and physiology of microbial communities	China	28.62	116.43				manure	pig manure	OF	0-20	1980	2008	17.5	1727	6	9.4	1	manure	upland	28	15	1.6	0.003331937	0.300104592	0.005573939	0.262364264	0.010264054	0.429764586	0.009622282	0.84729786	0.008666061	1.412962608	0.018728126	-0.048396541	0.001073284	0.090862365	0.017420247	0.27921437	0.00957825							0.365546367	0.018389409
27	Shi et al., 2014	Effect of 25-year fertilization on soil microbial biomass and community structure in a continuous corn cropping system	China	43.81	-125.4			30.6	NPK+plant residue	maize stalk	COF	0-20	1984	2009	4.8	615		19.45	1.39	plant residue	upland	25	2.5	0.3	0.000124766	0.039530839	0.001264502	0.13626488	0.000822475	0.045082759	0.001603012			-0.325047967	0.005338844					0.563526176	0.000601233							0.341331081	0.000652051
28	Shi et al., 2014	Effect of 25-year fertilization on soil microbial biomass and community structure in a continuous corn cropping system	China	43.81	-125.4			30.6	NPK+plant residue	maize stalk	COF	0-20	1984	2009	4.8	615		19.45	1.39	plant residue	upland	25	5	1.08	0.000132513	0.019960743	0.001406907	0.13626488	0.048843355	0.078004239	0.001423986			-0.43611506	0.001252327					0.668637507	0.000603594							1.237082914	0.004821611
29	Shi et al., 2014	Effect of 25-year fertilization on soil microbial biomass and community structure in a continuous corn cropping system	China	43.81	-125.4			30.6	plant residue	maize stalk	OF	0-20	1984	2009	4.8	615		19.45	1.39	plant residue	upland	25	2.5	1.18	0.000132188	-0.075349437	0.001244638	0	0.000319676	-0.062547905	0.001577176			-2.43458754	0.003435729					0.563019955	0.00166259							0.379419932	0.001323282
30	Shi et al., 2014	Effect of 25-year fertilization on soil microbial biomass and community structure in a continuous corn cropping system	China	43.81	-125.4			30.6	plant residue	maize stalk	OF	0-20	1984	2009	4.8	615		19.45	1.39	plant residue	upland	25	5	1.26	0.000188595	0.016000341	0.001408397	0.007272759	0.000317368	0.001706485	0.0013393			-2.60366387	0.008412645					0.632926434	0.00108458							0.656571097	0.004170921
31	Zhang et al., 2015	Linking organic carbon accumulation to microbial community dynamics in a sandy loam soil: result of 20 years compost and inorganic fertilizers repeated application experiment	China	35	114.4				NPK+compost	compost (wheat straw, oil cake and cotton cake)	COF	0-20	1989	2009	15	603	8.65	4.48	0.43	compost	upland	20	1.39			0.281951398	2.67E-05																			0.014091639	0.014442916	0.197349608	0.001974386
32	Zhang et al., 2015	Linking organic carbon accumulation to microbial community dynamics in a sandy loam soil: result of 20 years compost and inorganic fertilizers repeated application experiment	China	35	114.4				compost	compost (wheat straw, oil cake and cotton cake)	OF	0-20	1989	2009	15	603	8.65	4.48	0.43	compost	upland	20	2.78			0.555525803	1.89E-05																			-0.058681834	0.014442916	0.12555032	0.002603298
33	Turgay et al., 2014	Changes in Soil Ergosterol Content, Glomalin-Related Soil Protein, and Phospholipid Fatty Acid Profile as Affected by Long-Term Organic and Chemical Fertilization Practices in Mediterranean Turkey	Turkey	37.02	35.36				manure	farmyard manure	OF	0-5	1996	2009	19.1	670				manure	upland	13	25											0.275705881	0.018728126											-0.115706808	0.014442916
34	Turgay et al., 2014	Changes in Soil Ergosterol Content, Glomalin-Related Soil Protein, and Phospholipid Fatty Acid Profile as Affected by Long-Term Organic and Chemical Fertilization Practices in Mediterranean Turkey	Turkey	37.02	35.36				compost	compost plant residue	OF	0-5	1996	2009	19.1	670				compost	upland	13	25											0.275705881	0.018728126											-0.183661258	0.014442916
35	Yu et al., 2013	Microbial biomass and community composition in a Luvisol soil as influenced by long-term land use and fertilization	China	41.53	123.38				NPK+manure	recycled manure	COF	0-20	1990	2008	7.5	700	6.7	22.1	0.8	manure	upland	18						0.125163143	0.010264054	-0.391703423	0.009622282	0.107630664	0.008666061	0.554279652	0.018728126	0.001139601	0.001073284	0.218903193	0.017420247	0.359390445	0.003571346							0.096802439	0.013735944
36	Yu et al., 2013	Microbial biomass and community composition in a Luvisol soil as influenced by long-term land use and fertilization	China	41.53	123.38				manure	recycled manure	OF	0-20	1990	2008	7.5	700	6.7	22.1	0.8	manure	upland	18						-0.019231362	0.010264054	-0.458826907	0.009622282	-0.146603474	0.008666061	-1.548512558	0.018728126	-0.065983883	0.001073284	-0.108667924	0.017420247	0.63598364	0.004114882							0.245479505	0.014506729
37	Daquiado et al., 2013; Daquiado et al., 2016	Microbial Community Structure of Paddy Soil Under Long-term Fertilizer Treatment Using Phospholipid Fatty Acid (PLFA) Analysis	Korea	36.6	128.75				NPK+compost	compost (straw)	COF	0-15	1973	2012	12.9	1020				compost	paddy	39	10	0.1	0.006896048	0.287682072	0.00336927	0.287682072	0.083425926					0.286496536	0.000489634			1.185623666	0.000151345									0.37869051	0.018389409
38	Daquiado et al., 2013; Daquiado et al., 2016	Microbial Community Structure of Paddy Soil Under Long-term Fertilizer Treatment Using Phospholipid Fatty Acid (PLFA) Analysis	Korea	36.6	128.75				compost	compost (straw)	OF	0-15	1973	2012	12.9	1020				compost	paddy	39	10	-0.2	0.00755516	0.181346423	0.002212063	0.245122458	0.174179269					-0.523544396	0.000894534			1.036091932	0.000165691									0.395863227	0.018389409
39	Zhang et al., 2012	Long-term field fertilization affects soil nitrogen transformations in a rice-wheat-rotation cropping system	China	31.65	120.75				NPK+plant residue	rice or wheat straw	COF	0-10	1988	2010	16.1	1125				plant residue	paddy	22	2.25	-0.1	0.000892298	0.166016848	0.000424915	0.040821995	0.000113926													0.099090903	0.003670939					0.092996257	0.022587726
40	Zhang et al., 2012	Long-term field fertilization affects soil nitrogen transformations in a rice-wheat-rotation cropping system	China	31.65	120.75				NPK+plant residue	rice or wheat straw	COF	0-10	1988	2010	16.1	1125				plant residue	paddy	22	4.5	-0.1	0.000892298	0.197480117	0.00068501	0.080042708	0.002064979													0.108480643	0.00529515					0.391240117	0.034554768
41	Ai et al., 2018	Responses of extracellular enzyme activities and microbial community in both the rhizosphere and bulk soil to long-term fertilization practices in a fluvo-aquic soil	China	37.92	115.22				NPK+compost	compost farmyard manure	COF	0-20	1979	2010	12.6	490	7.8	6.38	1.8	compost	upland	31	37.5	-0.11	0.000334155	0.197221934	0.002316433	0.303186259	0.010739061	0.175348838	0.009622282			0.787032714	0.056329518			0.280137917	0.024127837									0.586542441	0.006349413
42	Ai et al., 2018	Responses of extracellular enzyme activities and microbial community in both the rhizosphere and bulk soil to long-term fertilization practices in a fluvo-aquic soil	China	37.92	115.22				compost	compost farmyard manure	OF	0-20	1979	2010	12.6	490	7.8	6.38	1.8	compost	upland	31	37.5	-0.18	6.37E-05	0.192167163	0.006848729	0.271933715	0.005722737	-0.425939646	0.009622282			-0.65841078	0.044030881			0.090895917	0.066144038									0.514495938	0.012494041
43	Chen et al., 2015	Microbial community and functional diversity associated with different aggregate fractions of a paddy soil fertilized with organic manure and/or NPK fertilizer for 20 years	China	28.26	116.84			38	NPK+manure plus plant residue	straw and pig manure	COF	0-15	1990	2010	17.6	1795	4.5	3.3	0.43	manure plus plant residue	paddy	20	3.133			0.064591307	0.001668061	0.116724274	0.007801027																			0.057708318	0.081542258
44	Chen et al., 2015	Microbial community and functional diversity associated with different aggregate fractions of a paddy soil fertilized with organic manure and/or NPK fertilizer for 20 years	China	28.26	116.84			38	manure plus plant residue	straw and pig manure	OF	0-15	1990	2010	17.6	1795	4.5	3.3	0.43	manure plus plant residue	paddy	20	3.133			0.027490278	0.006580589	0.018868484	0.012767868																			-0.119021426	0.136791389
45	Dong et al., 2014	Changes in soil microbial community composition in response to fertilization of paddy soils in subtropical China	China	26.74	115.06				compost	compost pig manure	OF	0-20	1998	2011	17.8	1471.2	5.97	9.71	1.02	compost	paddy	13	41	-0.1	0.00139315	0.18707216	0.015430317	0.117783036	0.006736272	0.057158414	0.009622282	0.395895657	0.071712857											-0.032648123	0.001882787			0.26464824	0.034500108
46	Ai et al., 2015	The alleviation of acid soil stress in rice by inorganic or organic ameliorants is associated with changes in soil enzyme activity and microbial community composition	China	22.1	112.77				NPK+compost	compost chicken manure	COF	0-20	2011	2013	21.5	1530	4.07	23.61	1.9	compost	paddy	3	2.25	0.63	0.000720703	0.015823697	0.018136451	0.036813973	0.019282498					0.412900087	0.034073498			0.589202278	0.044085873							0.226010252	0.011493557	0.128304012	0.015594027
47	Wang et al., 2017	Fertilization alters microbial community composition and functional patterns by changing the chemical nature of soil organic carbon: A field study in a Halosol	China	46.71	124.77	81.2	10.8	8	compost	compost	OF	0-20	2004	2014	4.2	427.5	9.2	15.1	1.6	compost	upland	11	30																									0.156713238	0.002523527
48	Suh et al., 2009	Impact of Amendments on Microbial Biomass, Enzyme Activity and Bacterial Diversity of Soils in Long-term Rice Field Experiment	Korea	37.27	126.99				NPK+compost	compost rice straw	COF	0-20	1954	2007	12.6	1229				compost	paddy	54	7.5	-0.27	0.003331937			0.438254931	0.010264054					0.463197575	0.018728126					0.406194237	0.00957825
49	Bai et al., 2008	Effect of different fertilizaiton on microbial community in an arable mollisol	China	43.50638889	124.8091667				NPK+manure	pig manure	COF	0-20	1980	2006	6.3	627				manure	upland	26	4.5	-0.36	0.003331937	0.23234524	0.005573939	0.561087459	0.010264054	0.284135486	0.009622282			2.396100312	0.018728126			0.224341743	0.017420247	0.269080274	0.000299546							0.205682619	0.001021889
50	Bai et al., 2008	Effect of different fertilizaiton on microbial community in an arable mollisol	China	43.50638889	124.8091667				manure	pig manure	OF	0-20	1980	2006	6.3	627				manure	upland	26	4.5	-0.23	0.003331937	0.323335759	0.005573939	0.578580616	0.010264054	0.359285911	0.009622282			2.142295222	0.018728126			0.448442816	0.017420247	0.052698296	0.000314359							0.249164366	0.000524413
51	Li et al., 2018	Effect of fertilization managements on soil organic carbon and microbial community structure	China	36.85166667	105.9019444				NPK+manure	Sheep manure	COF	0-20			9.1	272.6	9.2	3.35	0.18	manure	upland	4	37.5			0.268418773	0.066513765																					0.492794622	0.006259258
52	Li et al., 2018	Effect of fertilization managements on soil organic carbon and microbial community structure	China	36.85166667	105.9019444				NPK+manure	Sheep manure	COF	0-20			9.1	272.6	9.2	3.35	0.18	manure	upland	4	37.5			0.36427755	0.061002584																					0.653720261	0.020082555
53	Zhang et al., 2011	The influence of the long-term application of organic manure and mineral fertilizer on microbial community in calcareous fluvo-aquic soil	China	35.07	113.17				compost	compost	OF	0-20	1989	2009	13.9	655	8.65	5.83	0.445	compost	upland	20	9	0.1	0.003331937	0.555525803	0.005573939	0.602996084	0.010264054					0.562608309	0.018728126			0.053345981	0.017420247									0.140483456	0.018389409
54	Chen et al., 2014	Effects of Long-Term Fertilization on Flue-Cured Tobacco Soil Nutrients and Microorganisms Community Structure	China	24.23333333	102.5				NPK+green manure	green manure	COF	0-20	1998	2013	15.9	981	6.4	6.21	0.54	green manure	upland	25				0.408840069	0.005573939							0.370362434	0.018728126			-0.135747869	0.017420247							0.122463127	0.014442916	0.419295462	0.018389409
55	Yang et al., 2014	Effects of long-term fertilization on soil microorganisms in tobacco fields	China	24.23333333	102.5				NPK+manure	farmyard manure	COF	0-20	1998	2012	15.9	981	6.4	6.21	0.54	manure	upland	14																		0.649605028	0.00957825							0.403032609	0.018389409
56	Ding et al 2012	Effects of long-term fertilization on microorganisms in flue-cured tobacco grown soil	China	27.13	105.6				NPK+manure	pig manure	COF	0-21	2004	2010	15.2	1098	6.07	14.9	1.69	manure	upland	6	0.75																	0.377572289	0.040279937							0.261399064	0.018389409
57	Pei et al., 2010	Effect of Long-Term Fertilization on Soil Biological Characteristics in a Paddy Soil Derived from Yellow-Brown Earth	China	30.61666667	114.3336111				NPK+compost	composted pig manure	COF	0-20	1981	2008	10	1300	6.3	15.91	1.801	compost	paddy	27	22.5	0.12	0.000257138	-0.299907568	0.003952654	0.282487256	0.001220627	0.411041331	0.006587479	1.288368824	0.002458221	1.84395141	0.008367258			0.394547774	0.005533234	-0.196315375	0.019530788							0.299329522	0.081360879
58	Pei et al., 2010	Effect of Long-Term Fertilization on Soil Biological Characteristics in a Paddy Soil Derived from Yellow-Brown Earth	China	30.61666667	114.3336111				compost	composted pig manure	OF	0-20	1981	2008	10	1300	6.3	15.91	1.801	compost	paddy	27	22.5	0.1	8.51E-05	-0.383057936	0.009513255	0.184047183	0.002459401	0.139802462	0.019471558	0.870481196	0.004521423	1.550215647	0.009060174			-0.086784858	0.011938442	-0.531673082	0.01218836							0.286245438	0.062928967
59	Li et al., 2015	Effects of long-term fertilization on soil microbial community structure and aggregate composition in yellow clayey paddy field	China	26.23	119.07				NPK+manure	cattle manure	COF	0-20	1983	2011	19.5	1350.9	4.9	12.53	1.4	manure	paddy	28	7.5																									0.118502205	0.004236171
60	Li et al., 2015	Effects of long-term fertilization on soil microbial community structure and aggregate composition in yellow clayey paddy field	China	26.23	119.07				NPK+plant residue	rice straw	COF	0-20	1983	2011	19.5	1350.9	4.9	12.53	1.4	plant residue	paddy	28																										-0.032112551	0.005079247
61	Yan et al., 2008	Effects of long-term fertilization on phospholipid fatty acids and enzyme activities in paddy red soil	China	28.25555556	116.925				manure plus plant residue	pig manure plus rice straw	OF	0-20	1985	2006	17.8	1785				manure plus plant residue	paddy	21		-0.38	0.003331937			2.22707754	0.010264054					-0.733063788	0.018728126			0.311737207	0.017420247									-0.768791359	0.0196
62	Wang et al 2018	Effects of long-term fertilization regimes on microbial biomass, community structure and activity in a paddy soil	China	28.1167	112.3				NPK+plant residue	rice straw	COF	0-20			16.8	1553.7				plant residue	paddy	30		0.44	8.13E-06	0.102956212	0.00065849	0.10074157	0.00046317	-0.075880876	0.004229445	-0.870481196	0.000297022	-0.341344353	0.003618466					0.315403248	0.002968905							0.127597116	0.022855512
63	Wang et al 2018	Effects of long-term fertilization regimes on microbial biomass, community structure and activity in a paddy soil	China	28.1167	112.3				NPK+plant residue	rice straw	COF	0-20			16.8	1553.7				plant residue	paddy	30		0.18	0.000177763	0.331875526	0.000382199	0.372675285	0.000338821	0.020813512	0.01108355	-0.870481196	0.0006683	1.11188949	0.003318369					0.389312518	0.001902287							0.210423058	0.009650368
64	Chen et al., 2015	Effect of long-term fertilizations on microbial community structure and functional diversity in paddy soil of subtropical China	China	28.25	116.92				NPK+manure plus plant residue	pig manure plus rice straw	COF	0-15	1990	2010	17.6	1795	4.5	3.31	0.43	manure plus plant residue	paddy	20	0.833			0.064591307	0.00070996	0.116724274	0.005526776	0.03463754	0.002231326	0.191055237	0.004315224	0.553558167	0.01386755	-0.048108578	0.001694762	0.188449385	0.048692096							0.032239682	0.002421062	0.072939446	0.007279077
65	Chen et al., 2015	Effect of long-term fertilizations on microbial community structure and functional diversity in paddy soil of subtropical China	China	28.25	116.92				NPK+plant residue	rice straw	COF	0-15	1990	2010	17.6	1795	4.5	3.31	0.43	plant residue	paddy	20				-0.015319449	0.000248366	0.082238098	0.005277103	0.03463754	0.013468778	-0.111225635	0.004615385	-0.10101435	0.011758847	-0.043350441	0.006133247	0.167999275	0.044900226							0.009003086	0.001851612	-0.324077882	0.002479854
66	Chen et al., 2015	Effect of long-term fertilizations on microbial community structure and functional diversity in paddy soil of subtropical China	China	28.25	116.92				manure plus plant residue	pig manure plus rice straw	OF	0-15	1990	2010	17.6	1795	4.5	3.31	0.43	manure plus plant residue	paddy	20	0.833			0.027490278	0.002346093	0.018868484	0.007265204	-0.023809492	0.009404891	-0.354171814	0.003398225	-0.744400021	0.010722205	-0.021440331	0.001228002	0.178337829	0.022203076							-0.456719388	0.001819101	-0.202213922	0.002495014
67	Xia et al., 2015	The changes of microbial community structure in red paddy soil under long-term fertilization	China	28.25833333	116.34				NPK+green manure plus manure	Milk vetch plus pig manure	COF	0-20	1981	2013	12.5	1537	6.9	9.45	1.49	green manure plus manure	paddy	32	22.5																									0.138472452	0.140178833
68	Wu et al., 2015	Responses of soil nutrients and microbial biomass and community composition to long-term fertilization in cultivated land	China	30.098	120.062				NPK+compost	compost manure	COF	0-20	1996	2013	17.7	1345	5.7	16.82	1.7	compost	paddy	17	1.5	-0.23	6.38E-05	0.068822548	0.00059999	0.009302393	0.000723036			0	0.014417532					0.059595458	0.002775421									-0.027738204	0.0196
69	Wu et al., 2015	Responses of soil nutrients and microbial biomass and community composition to long-term fertilization in cultivated land	China	30.098	120.062				NPK+plant residue	straw	COF	0-20	1996	2013	17.7	1345	5.7	16.82	1.7	plant residue	paddy	17	7.5	0.14	0.00035726	0.176247703	0.001008336	0.072103294	0.000522545			0.199332903	0.015965517					0.009712743	0.001969989									0.47942587	0.0196
70	Wu et al., 2015	Responses of soil nutrients and microbial biomass and community composition to long-term fertilization in cultivated land	China	30.098	120.062				compost	compost manure	OF	0-20	1996	2013	17.7	1345	5.7	16.82	1.7	compost	paddy	17	1.5	0.73	0.000277708	-0.032307396	0.001689747	-0.087861356	0.001021158			-0.327687407	0.020280021					-0.303669296	0.001040732									0.594205996	0.021015579
71	Wu et al., 2015	Responses of soil nutrients and microbial biomass and community composition to long-term fertilization in cultivated land	China	30.098	120.062				plant residue	straw	OF	0-20	1996	2013	17.7	1345	5.7	16.82	1.7	plant residue	paddy	17	7.5	0.54	0.000291724	0.14482138	0.000495554	0.018519048	0.00052896			-0.014815086	0.021748215					-0.32173789	0.001495973									0.947393936	0.029177985
72	Bi et al 2010	Study on the Effects of Different Land Use Patterns on Microbial Community Structure in Aquic Brown Soil by Utilizing PLFA Method	China	41.53333333	122.3833333				NPK+compost	compost recycle pig manure	COF	0-20	1990	2008	7.5	650	6.5	11.57	1.06	compost	upland	18																		0.282703399	0.00957825							0.087011377	0.015012226
73	Bi et al 2010	Study on the Effects of Different Land Use Patterns on Microbial Community Structure in Aquic Brown Soil by Utilizing PLFA Method	China	41.53333333	122.3833333				compost	compost recycle pig manure	OF	0-20	1990	2008	7.5	650	6.5	11.57	1.06	compost	upland	18																		-0.003268906	0.00957825							0.242765906	0.018772587
74	He et al., 2014	PCR-DGGE analysis of soil bacterium community diversity in farmland influenced by biochar	China	30.44	120.41				NPK+plant residue	straw	COF	0-20	2011	2012	16.7	1550				plant residue	paddy	1	16.7	-0.15	0.003331937	-0.020684906	0.005573939	0.080042708	0.010264054					0.164880289	0.018728126			0.006577832	0.017420247
75	Yang et al., 2016	Effects of Long-Term Application of Chloride Containing Fertilizers on the Biological Fertility of Purple Soil Under a Rice-Wheat Rotation System	China	30.43333333	106				NPK+plant residue	rice straw	COF	0-20	1991	2013	18.3	1105.5				plant residue	paddy	22		-0.11	0.003331937	0.076820206	0.005573939			0.065505172	0.009622282			0.397389694	0.018728126			0.070928319	0.017420247									0	0.018389409
76	Zhou et al., 2019	Effects of Different Fertilizing Patterns on Farmland Soil Fertility in Arid Region in Ningxia	China	36.85	105.98				NPK+manure	cattle manure	COF	0-20	2011	2017	9.7	200	8.74	2.77	0.25	manure	upland	6	37.5	-0.11	1.67E-05	0.286024691	0.003057752	0.310154928	0.006088154	0.505618932	0.013164481	0.037740328	0.001333864	0.321253173	0.001119419			0.188720778	0.011085777									0.394693011	0.052831659
77	Zhou et al., 2019	Effects of Different Fertilizing Patterns on Farmland Soil Fertility in Arid Region in Ningxia	China	36.85	105.98				NPK+manure	sheep manure	COF	0-20	2011	2017	9.7	200	8.74	2.77	0.25	manure	upland	6	37.5	-0.16	1.68E-05	0.305729417	0.002526212	0.405465108	0.010407101	0.585602873	0.014741085	0.050010421	0.001322779	0.687182289	0.000822916			0.173778351	0.020622726									0.362657016	0.02125379
78	Jiang et al., 2017	Effects of different fertilizer applications on microbial metabolic activity and community structure in tea rhizosphere soil	China	24.35	117.75				manure	sheep manure	OF	0-30	2014	2016	17	1800	4.8			manure	upland	2	15	0.08	1.66E-05	0.08104121	0.001007103	0.149143158	0.002784044	0.252906986	0.000197113			1.95525216	0.00085162			0.045809536	0.017420247	1.049219473	0.00957825
79	Jiang et al., 2017	Effects of different fertilizer applications on microbial metabolic activity and community structure in tea rhizosphere soil	China	24.35	117.75				green manure	green manure	OF	0-30	2014	2016	17	1800	4.8			green manure	upland	2	14.3	0.07	2.38E-05	0.276253377	0.001028955	0.124751705	0.004571895	0.249777732	0.00010653			2.564800703	0.000202272			0.103796794	0.017420247	1.614245383	0.00957825
80	Zhang et al., 2017	PLFA fingerprint of red paddy soils as affected by fertilization pattern and groundwater table	China	29.13333333	113.6833333				plant residue	rice and Ryegrass residue	OF	0-20	1982		17.1	1572				plant residue	paddy	30	30	-0.01	2.70E-05	0.247281686	0.00466283	0.238891908	0.010912908	0.152083139	0.012270377	0	0.002564892	0.252064897	0.045438795	-0.022908491	0.001623344	0.375298263	0.011256802									0.017603704	0.033033231
81	Zhang et al., 2017	PLFA fingerprint of red paddy soils as affected by fertilization pattern and groundwater table	China	29.13333333	113.6833333				plant residue	rice and Ryegrass residue	OF	0-20	1982		17.1	1572				plant residue	paddy	30	60	-0.06	2.72E-05	0.323091719	0.006111364	0.339867826	0.013708082	0.048120596	0.014185884	-0.111225635	0.002794933	0.11563573	0.043341602	0.032565003	1.83E-05	0.52070639	0.016974958									0.351676132	0.012237874
82	Gou et al., 2013	Short -term Effects of Tillage Practices and Wheat -straw Returned to Rice Fields on Topsoil Microbial Community Structure and Microbial diversity in Central China	China	31.6	113.2833333				NPK+plant residue	straw	COF	0-5	2011	2012	15.2	970	5.38	13.81670534	1.42	plant residue	paddy	1	2																									-0.077044428	0.009807913
83	Gou et al., 2013	Short -term Effects of Tillage Practices and Wheat -straw Returned to Rice Fields on Topsoil Microbial Community Structure and Microbial diversity in Central China	China	31.6	113.2833333				NPK+plant residue	straw	COF	0-5	2011	2012	15.2	970	5.38	13.81670534	1.42	plant residue	paddy	1	4																									0.013899381	0.007066853
84	Gou et al., 2013	Short -term Effects of Tillage Practices and Wheat -straw Returned to Rice Fields on Topsoil Microbial Community Structure and Microbial diversity in Central China	China	31.6	113.2833333				NPK+plant residue	straw	COF	0-5	2011	2012	15.2	970	5.38	13.81670534	1.42	plant residue	paddy	1	6																									0.008303725	0.006392706
85	Huang et al., 2018	Effects of potassium sources and rates on crop yields and microbial community structure in a four-year experiment in purple soil	China	30.703	103.8607				NPK+plant residue	straw	COF	0-20	2012.8	2016.7	16.8	965	7.7	9.744779582		plant residue	upland	4	0.075																							0.058577309	0.014442916	0.314891601	0.018389409
86	Hu et al., 2018	Effects of straw-returning and tillage depth on soil properties in plough layer of paddy soil	China	29.208	119.46				NPK+plant residue	rape straw	COF	0-20			18.5	1353	4.9	11.60092807		plant residue	paddy	1	4.5	-0.44	0.001850845	0.043995365	0.000502471			0.136039103	0.000777491			0.218821223	0.002880935			-0.0440417	0.000887214							0.068346083	0.000422232	0.426859016	0.006864309
87	Hu et al., 2018	Effects of straw-returning and tillage depth on soil properties in plough layer of paddy soil	China	29.096	119.6459				NPK+plant residue	rape straw	COF	0-20			18.5	1377	4.3	10.78886311		plant residue	paddy	1	4.5	0.14	0.000441344	0.014388737	0.000232568			-0.013229906	0.003964919			0.540706465	0.005427059			0.07064389	0.001171715							0.151228581	0.000591878	0.09217551	0.004525858
88	Si et al., 2013	Effects of Green Manure Application Combined with Chemical Fertilizers on Soil Microbial Community Structure of Tobacco-planting Soil	China	30.33722222	109.4369444				NPK+green manure		COF	0-20	2009	2011	14	1668				green manure	upland	3	15	0	0.003331937	0.00404041	0.005573939	0.060624622	0.010264054					0.063715814	0.018728126			-0.008714652	0.017420247	-0.388000107	0.00957825							-0.177181524	0.018389409
89	Si et al., 2013	Effects of Green Manure Application Combined with Chemical Fertilizers on Soil Microbial Community Structure of Tobacco-planting Soil	China	30.33722222	109.4369444				NPK+green manure		COF	0-20	2009	2011	14	1668				green manure	upland	3	15	-0.1	0.003331937	0.031875208	0.005573939	0	0.010264054					0.327977613	0.018728126			0.024286908	0.017420247	0.088512995	0.00957825							0.030838967	0.018389409
90	Si et al., 2013	Effects of Green Manure Application Combined with Chemical Fertilizers on Soil Microbial Community Structure of Tobacco-planting Soil	China	30.33722222	109.4369444				NPK+green manure		COF	0-20	2009	2011	14	1668				green manure	upland	3	15	-0.2	0.003331937	0.016064602	0.005573939	0.060624622	0.010264054					0.365191209	0.018728126			0.254042286	0.017420247	0.199888396	0.00957825							0.132142156	0.018389409
91	Ma et al., 2019	Effects of maize straw returning on arbuscular mycorrhizal fungal community structure in soil	China	37.15944444	105.8005556				NPK+plant residue	maize straw	COF	0-20	2014	2017	10.2	277	8.26	5.336426914	0.54	plant residue	upland	3	3
92	Ma et al., 2019	Effects of maize straw returning on arbuscular mycorrhizal fungal community structure in soil	China	37.15944444	105.8005556				NPK+plant residue	maize straw	COF	0-20	2014	2017	10.2	277	8.26	5.336426914	0.54	plant residue	upland	3	6
93	Ma et al., 2019	Effects of maize straw returning on arbuscular mycorrhizal fungal community structure in soil	China	37.15944444	105.8005556				NPK+plant residue	maize straw	COF	0-20	2014	2017	10.2	277	8.26	5.336426914	0.54	plant residue	upland	3	9
94	Ma et al., 2019	Effects of maize straw returning on arbuscular mycorrhizal fungal community structure in soil	China	37.15944444	105.8005556				NPK+plant residue	maize straw	COF	0-20	2014	2017	10.2	277	8.26	5.336426914	0.54	plant residue	upland	3	12
95	Deng et al., 2018	Effect of Long Term Straw Incorporation on the Soil Structure and Microbial Communities in a Paddy-upland Rotation	China	30.55694444	112.0813889	3.5	61	35.5	NPK+plant residue	rice and rape straw	COF	0-20	2011	2017.5.2	17.4	1048	5.97	15.60324826	0.61	plant residue	paddy	6				0.141346149	2.41E-05			0.054397714	0.001471965			0.209110314	0.006863663			0.343787558	0.00161781									0.243259061	0.001957042
96	Bai et al., 2008	Characteristics of bacterial community in an arable mollisol under long-term phosphorus fertilization	China	43.50638889	124.8094167				NPK+manure	pig manure	COF	0-20	1980	2006.4.11	6.3	627				manure	upland	27	4.5			0.311449188	0.000101716	0.267879445	0.000422573	0.404596089	0.009622282			2.482537916	0.016806707			0.536413536	0									0.676338955	0.058111875
97	Wang et al., 2018	Soil microbial community structure, labile organic carbon and nitrogen and enzyme activities in paddy field and upland affected by long-term fertilization systems	China	30.7	103.85				NPK+manure	manure	COF	0-20	2009	2015.3	16.8	965	5.42	8.004640371	0.5	manure	upland	7	22.5	0.08	0.005059879	0.245449309	0.005621434	0.136132174	0.005318526	0.083230654	0.009622282			0.349211262	0.000996835			0.144604482	0.003278367	1.126114234	0.008364518			-0.013770529	0.005887269
98	Wang et al., 2018	Soil microbial community structure, labile organic carbon and nitrogen and enzyme activities in paddy field and upland affected by long-term fertilization systems	China	30.7	103.85				NPK+manure	manure	COF	0-20	2009	2015.3	16.8	965	5.42	8.004640371	0.5	manure	paddy	7	22.5	0.19	0.007021471	0.118904741	0.004909188	0.050772325	0.001427049	0.205898287	0.009622282			0.035209001	0.001473903			0.058664756	0.002472911	0.329404302	0.0048477			-0.049919581	0.013930875
99	Bu et al., 2010	Impact of long-term fertilization on the microbial biomass carbon and soil microbial communities in paddy red soil	China	28.11666667	112				NPK+manure	manure	COF	0-20	1986	2005.12	17.3	1324				manure	paddy	20																		0.426517778	0.001536204							0.108348204	0.018389409
100	Bu et al., 2010	Impact of long-term fertilization on the microbial biomass carbon and soil microbial communities in paddy red soil	China	28.11666667	112				plant residue	straw	OF	0-20	1986	2005.12	17.3	1324				plant residue	paddy	20																		0.221723906	0.001348842							0.146330273	0.018389409
101	Bu et al., 2010	Impact of long-term fertilization on the microbial biomass carbon and soil microbial communities in paddy red soil	China	28.11666667	112				NPK+manure	manure	COF	0-20	1986	2005.12	17.3	1324				manure	paddy	20																		0.349559297	0.002229976							0.372932506	0.018389409
102	Li et al., 2018	Effect of fertilization managements on soil organic carbon and microbial community structure	China	36.85166667	105.9019444				NPK+manure	cow manure	COF	0-20			9.1	272.6	9.2	3.35	0.18	manure	upland	4	37.5			0.153042646	0.00388941																					0.492794622	0.006259258
103	Li et al., 2018	Effect of fertilization managements on soil organic carbon and microbial community structure	China	36.85166667	105.9019444				NPK+manure	sheep manure	COF	0-20			9.1	272.6	9.2	3.35	0.18	manure	upland	4	37.5			0.409762493	0.001760967																					0.653720261	0.020082555
104	Li et al., 2019	Effects of straw management and nitrogen application rate on soil organic matter fractions and microbial properties in North China Plain	China	35.01666667	114.5666667				NPK+plant residue	wheat and maize straw	COF	0-20			14.5	597	7.9	7.71	0.8	plant residue	upland	2	15.7			0.101945601	0.003695231	0.067441281	0.00362617											0.054435207	0.02795977			-0.040409538	0.012271028			0.207639365	0.025980091
105	Li et al., 2019	Changes in soil bacterial community structure and microbial function caused by straw retention in the North China Plain	China	36.83333333	116.5666667	12	66	22	NPK+plant residue	straw	COF	0-20			13.4	567	8.13	9.23	1.11	plant residue	upland	4	14.5			0.085471731	0.002241611	0.03333642	0.001979269	0.222850228	0.004328654									0.369381232	0.00334608
106	Zhang et al., 2018	Linking macroaggregation to soil microbial community and organic carbon accumulation under different tillage and residue managements	China	35	114.4	52	33	15	NPK+plant residue	wheat and maize straw	COF	0-10			13.9	615	8.3	6.09	0.55	plant residue	upland	9		0.03	0.000309591	0.368855362	0.033031595	-0.111917916	0.010264054																			0.444256485	0.015414171
107	Chen et al., 2020	Microbial functional attributes, rather than taxonomic attributes, drive top soil respiration, nitrification and denitrification processes	China	37.33333333	116.6333333				NPK+sewage sludge	sewage sludge	COF	0-15			13.8	562				sewage sludge	upland	11	4.5																									0.136618794	0.002080037
108	Chen et al., 2020	Microbial functional attributes, rather than taxonomic attributes, drive top soil respiration, nitrification and denitrification processes	China	37.33333333	116.6333333				NPK+sewage sludge	sewage sludge	COF	0-15			13.8	562				sewage sludge	upland	11	9																									0.374142637	0.002521246
109	Chen et al., 2020	Microbial functional attributes, rather than taxonomic attributes, drive top soil respiration, nitrification and denitrification processes	China	37.33333333	116.6333333				NPK+sewage sludge	sewage sludge	COF	0-15			13.8	562				sewage sludge	upland	11	18																									0.494150598	0.002637557
110	Chen et al., 2020	Microbial functional attributes, rather than taxonomic attributes, drive top soil respiration, nitrification and denitrification processes	China	37.33333333	116.6333333				NPK+sewage sludge	sewage sludge	COF	0-15			13.8	562				sewage sludge	upland	11	36																									0.660950201	0.006456561
111	Chen et al., 2020	Microbial functional attributes, rather than taxonomic attributes, drive top soil respiration, nitrification and denitrification processes	China	37.33333333	116.6333333				NPK+manure	chicken manure	COF	0-15			13.8	562				manure	upland	11	10																									0.268004819	0.005965337
112	Li et al., 2020	Differential accumulation of microbial necromass and plant lignin in synthetic versus organic fertilizer-amended soil	China	43.5	124.8	39	30	31	manure	pig manure	OF	0-20			5.5	600		19	1.41	manure	upland	29	30	-0.05	0.003331937	0.219997246	0.000135197	0.232252268	0.000351875											0.368783541	0.001093091	-0.016129382	0.004629345			-0.051947614	0.014442916
113	Li et al., 2020	Differential accumulation of microbial necromass and plant lignin in synthetic versus organic fertilizer-amended soil	China	43.5	124.8	39	30	31	NPK+manure	pig manure	COF	0-20			5.5	600		19	1.41	manure	upland	29	30	0.14	0.003331937	0.292904016	0.00026534	0.330854244	0.000311835											0.520734	0.002789048	-0.040821995	0.004629345			0.062756091	0.014442916
114	Li et al., 2020	Differential accumulation of microbial necromass and plant lignin in synthetic versus organic fertilizer-amended soil	China	43.5	124.8	39	30	31	manure	pig manure	OF	0-20			5.5	600		19	1.41	manure	upland	29	60	0.18	0.003331937	0.434701928	0.00039249	0.575364145	0.000673319											0.871665611	0.00366634	-0.14618251	0.004629345			0.010653367	0.014442916
115	Li et al., 2020	Differential accumulation of microbial necromass and plant lignin in synthetic versus organic fertilizer-amended soil	China	43.5	124.8	39	30	31	NPK+manure	pig manure	COF	0-20			5.5	600		19	1.41	manure	upland	29	60	0.03	0.003331937	0.487519484	0.001078226	0.653141846	0.001242661											0.906497168	0.004228142	-0.164874643	0.004629345			-0.024238033	0.014442916
116	Wu et al., 2020	Organic management improves soil phosphorus availability and microbial properties in a tea plantation after land conversion from longan (Dimocarpus longan)	China	19.3	109.6333333				manure	sheep manure	OF	0-10			22.7	1900				manure	upland	3	6	0	1.70E-05	0.23835297	0.002894776	0.081917122	4.21E-05	-0.25230496	0.009622282	-0.044590292	5.40E-05	1.070813889	0.002926185	-0.478100839	0.000143119	-0.109326669	0.000544257									0.991734486	0.035264786
117	Gautam et al., 2020	Responses of Soil Microbial Community Structure and Enzymatic Activities to LongTerm Application of Mineral Fertilizer and Beef Manure	Germany	43.04262778	-96.89882778				manure	beef manure	OF	0-10			9.1	663				manure	upland	16	15.9	0.37	0.003331937	0.05907229	0.005573939							0.45413028	0.018728126			0.239479971	0.017420247									0.276912979	0.018389409
118	Gautam et al., 2020	Responses of Soil Microbial Community Structure and Enzymatic Activities to LongTerm Application of Mineral Fertilizer and Beef Manure	Germany	43.04262778	-96.89882778				manure	beef manure	OF	0-10			9.1	663				manure	upland	16	40.1	0.65	0.003331937	0.132770454	0.005573939							1.334793834	0.018728126			0.626252946	0.017420247									0.61532054	0.018389409
119	Gautam et al., 2020	Responses of Soil Microbial Community Structure and Enzymatic Activities to LongTerm Application of Mineral Fertilizer and Beef Manure	Germany	43.04262778	-96.89882778				manure	beef manure	OF	0-10			9.1	663				manure	upland	16	80.5	0.62	0.003331937	0.209665708	0.005573939							2.114736479	0.018728126			1.022591981	0.017420247									0.862278972	0.018389409
120	Tang et al., 2020	Influences of different manure N input on soil ammoniaoxidizing archaea and bacterial activity and community structure in a double-cropping rice field	China	28.11666667	112.3	13.86	58.06	28.08	NPK+manure	manure	COF	0-20			17.2	1553	6.8	22.75	2.24	manure	paddy	1	0.828	0.13	0.000466237	0.054746734	0.00062298																					0.008522322	0.018389409
121	Tang et al., 2020	Influences of different manure N input on soil ammoniaoxidizing archaea and bacterial activity and community structure in a double-cropping rice field	China	28.11666667	112.3	13.86	58.06	28.08	NPK+manure	manure	COF	0-20			17.2	1553	6.8	22.75	2.24	manure	paddy	1	1.38	0.21	0.000433171	0.078480318	0.00060169																					0.013553277	0.018389409
122	Tang et al., 2020	Influences of different manure N input on soil ammoniaoxidizing archaea and bacterial activity and community structure in a double-cropping rice field	China	28.11666667	112.3	13.86	58.06	28.08	NPK+manure	manure	COF	0-20			17.2	1553	6.8	22.75	2.24	manure	paddy	1	2.76	0.39	0.000420909	0.10374482	0.000559173																					0.02653225	0.018389409
123	Chen et al., 2019	Impacts of green manure amendment on detritus micro-food web in a double-rice cropping system	China	29.52555556	114.1469444				NPK+green manure	Chinese milk vetch	COF	0-20			17.3	1600		17.8		green manure	paddy	5	22.5			0.107988638	0.001126626			0.037139547	0.000644199			0.068053463	0.003563516			0.118408231	0.004696451									0.296870499	0.001460939
124	Su et al., 2020	Soil microbial community shifts with long-term of different straw return in wheat-corn rotation system	China	35.67	114.54				NPK+plant residue	corn straw	COF	0-20			14	578		9.98	0.92	plant residue	upland	11	10.4	-0.05	4.37E-05	0.224461364	0.001550037	0.102947969	0.003136107	0.051332214	0.005866379			0.733107265	0.003039958			0.650759402	0.000239782			0.118390016	0.007615284					0.173616414	0.018389409
125	Su et al., 2020	Soil microbial community shifts with long-term of different straw return in wheat-corn rotation system	China	35.67	114.54				NPK+plant residue	corn straw	COF	0-20			14	578		9.98	0.92	plant residue	upland	11	20.8	0.04	7.98E-05	0.132569392	0.000986357	0.135036284	0.003096724	-0.546661655	0.010643807			0.555651898	0.003019577			0.702980101	7.45E-05			-0.001823155	0.006637693					1.533961354	0.018389409
126	Su et al., 2020	Soil microbial community shifts with long-term of different straw return in wheat-corn rotation system	China	35.67	114.54				NPK+plant residue	wheat straw	COF	0-20			14	578		9.98	0.92	plant residue	upland	11	5.5	0.06	0.000100852	0.121925847	0.00124895	0.102947969	0.003451167	0.456879481	0.013352464			0.264728332	0.001644097			0.341541242	9.48E-05			0.014466798	0.007939388					0.09288673	0.018389409
127	Su et al., 2020	Soil microbial community shifts with long-term of different straw return in wheat-corn rotation system	China	35.67	114.54				NPK+plant residue	wheat straw	COF	0-20			14	578		9.98	0.92	plant residue	upland	11	11	-0.01	6.28E-05	-0.269532754	0.000813284	0.092018899	0.003136977	-0.354009658	0.011810107			0.364643114	0.001635681			0.427615851	2.81E-05			-0.365299066	0.006641113					0.764824151	0.018389409
128	Su et al., 2020	Soil microbial community shifts with long-term of different straw return in wheat-corn rotation system	China	35.67	114.54				NPK+plant residue	corn and wheat straw	COF	0-20			14	578		9.98	0.92	plant residue	upland	11	4.9	0.06	7.96E-05	-0.243963179	0.003184103	0.011976191	0.003143965	-0.09178759	0.103803432			0.546786592	0.001624064			0.301421248	3.32E-05			-0.252486075	0.009620451					0.344967371	0.018389409
129	Su et al., 2020	Soil microbial community shifts with long-term of different straw return in wheat-corn rotation system	China	35.67	114.54				NPK+plant residue	corn and wheat straw	COF	0-20			14	578		9.98	0.92	plant residue	upland	11	9.8	-0.05	4.37E-05	-0.011049836	0.00074592	0.058496207	0.003484121	0.610983214	0.006638402			-0.093465728	0.001692745			0.361013346	5.60E-05			-0.065875176	0.006635237					0.312811065	0.018389409
130	Wang et al., 2020	Long-term fertilization leads to specific PLFA finger-prints in Chinese Hapludults soil	China	26.18333333	106.1166667				NPK+manure	cow dung	COF				15.3	1150	6.79	25.75	2.03	manure	upland	21	15.25	0.82	0.000270224	0.597068741	0.010576404	0.337906957	0.001319146	0.372478209	0.003712454	0.15123097	0.014293487	-0.03650946	0.066726824					0.393126793	0.009184985							0.035929857	0.00062971
131	Zhou et al., 2020	Co-incorporation of green manure and rice straw improves rice production, soil chemical, biochemical and microbiological properties in a typical paddy field in southern China	China	28.46666667	113.35				NPK+green manure	Chinese milk vetch	COF	0-20			17.2	1422	4.81	10.4	1.05	green manure	paddy	3		0.02	0.000252173	0.007626348	0.001029637	0.111225635	0.002019667					0.079175593	0.001012478			-0.029182767	0.026464663			-0.013766196	0.003575701	0.274551876	0.006406187	0.039808496	6.78E-05	0.070127832	0.020888424
132	Zhou et al., 2020	Co-incorporation of green manure and rice straw improves rice production, soil chemical, biochemical and microbiological properties in a typical paddy field in southern China	China	28.46666667	113.35				NPK+plant residue	rice straw	COF	0-20			17.2	1422	4.81	10.4	1.05	plant residue	paddy	3		0.05	0.000295642	0.12741223	0.001253372	0.15415068	0.000731622					0.104867436	0.000586531			1.176724384	0.019846513			-0.029734599	0.002055723	0.491494537	0.002710117	0.045693122	0.00022463	0.216710075	0.01482215
133	Zhou et al., 2020	Co-incorporation of green manure and rice straw improves rice production, soil chemical, biochemical and microbiological properties in a typical paddy field in southern China	China	28.46666667	113.35				NPK+green manure plus plant residue	Chinese milk vetch+rice straw	COF	0-20			17.2	1422	4.81	10.4	1.05	green manure plus plant residue	paddy	3		0.09	0.000213315	0.189472958	0.00130057	0.211309094	0.000662971					0.098506092	0.000514818			1.209048397	0.010326657			-0.024717027	0.002052802	0.38805895	0.00063639	0.091757464	0.000784667	0.213477749	0.014551204
134	Ma et al., 2020	Farmyard manure applications stimulate soil carbon and nitrogen cycling by boosting microbial biomass rather than changing its community composition	England	51.99972222	-0.615556	80	6	10	manure	farmyard manure	OF	0-23			9.7	607				manure	upland	16	10	0	2.17E-05	-2.068970242	0.035405557	0.251314428	0.000953011	0.244453338	0.009622282									0.26341745	0.000251506			0.149791913	0.000577296
135	Ma et al., 2020	Farmyard manure applications stimulate soil carbon and nitrogen cycling by boosting microbial biomass rather than changing its community composition	England	51.99972222	-0.615556	80	6	10	manure	farmyard manure	OF	0-23			9.7	607				manure	upland	28	37.5	-0.1	1.79E-05	-1.988927534	0.023917947	-1.945910149	0.022959184	0.596297355	0.009622282									0.450988363	0.000460482			0.490001398	0.001318353
136	Bohme et al., 2005	Microbial biomass, enzyme activities and microbial community structure in two European long-term field experiments	Germany	51.4	11.88333333			22	manure	farmyard manure	OF	0-30			8.7	484				manure	upland	100	15	0.172	0.003331937	0.170051464	0.005573939	0.139761942	0.010264054											0.480572773	0.001985854							0.604322373	0.018389409
137	Bohme et al., 2005	Microbial biomass, enzyme activities and microbial community structure in two European long-term field experiments	Hungary	46.78333333	17.25			17	manure	farmyard manure	OF	0-30			10.4	653				manure	upland	39	15	0.731	0.003331937	0.157003749	0.005573939	0.064538521	0.010264054											0.033935172	0.002109511							0.849727458	0.018389409
138	Dangi et al., 2020	Soil microbial community structure affected by biochar and fertilizer sources	Ameica	36.595	-119.52	58	33	9	NPK+solid waste	poultry waste	COF				19.4	313	6.9	8.7		solid waste	upland	1.5		0	4.31E-05			0.15415068	0.001927325																	0.229399173	0.001681996	0.329754933	0.010544005
139	Dangi et al., 2020	Soil microbial community structure affected by biochar and fertilizer sources	Ameica	36.595	-119.52	58	33	9	NPK+solid waste	poultry waste	COF				19.4	313	6.9	8.7		solid waste	upland	1.5		0.2	0.000106618			0.287682072	0.001267287																	0.280858385	0.00258075	0.468532336	0.00563403
140	Dangi et al., 2020	Soil microbial community structure affected by biochar and fertilizer sources	Ameica	36.595	-119.52	58	33	9	solid waste	poultry waste	OF				19.4	313	6.9	8.7		solid waste	upland	1.5		0.1	6.04E-05			0.287682072	0.001267287																	0.259997316	0.004150174	0.349220141	0.012681033
141	Garc��a-Orenes et al., 2016	Organic fertilization in traditional mediterranean grapevine orchards mediates changes in soil microbial community structure and enchances soil fertility	Spain	38.82333333	-0.804722				manure plus plant residue	organic pruning +sheep manure	OF	0-15			16.3	413	8.48	9.3	0.35	manure plus plant residue	upland	10		-0.27	1.46E-05	0.608247737	0.001181756	1.150284299	0.005378574					0.451985124	0.010532037													0.546543706	0.033209968
142	Garc��a-Orenes et al., 2016	Organic fertilization in traditional mediterranean grapevine orchards mediates changes in soil microbial community structure and enchances soil fertility	Spain	38.82333333	-0.804722				green manure plus plant residue	organic pruning +leguminous crop vetch	OF	0-15			16.3	413	8.48	9.3	0.35	green manure plus plant residue	upland	10		-0.2	1.44E-05	0.651598178	0.002340649	1.06784063	0.005972366					0.356674944	0.012267574													0.624744454	0.025438431
143	Yang et al., 2019	Functional Soil Organic Matter Fractions, Microbial Community, and Enzyme Activities in a Mollisol Under 35 Years Manure and Mineral Fertilization	China	45.66666667	126.5833333				manure	horse manure	OF	0-10			3.5	533	7.22	26.7	1.47	manure	upland	35	18.6																									0.108566381	0.027360166
144	Yang et al., 2019	Functional Soil Organic Matter Fractions, Microbial Community, and Enzyme Activities in a Mollisol Under 35 Years Manure and Mineral Fertilization	China	45.66666667	126.5833333				NPK+manure	horse manure	COF	0-10			3.5	533	7.22	26.7	1.47	manure	upland	35	18.6																									0.498827326	0.012313447
145	Luan et al., 2019; Luan et al., 2020	Manure substitution of chemical fertilizer affect soil microbial community diversity, structure and function in greenhouse vegetable production systems	China	39.22	117				NPK+manure	manure	COF	0-20			11.6	586	7.9	14.7		manure	upland	8	10.369	0.19	4.81E-05	0.137297875	0.000379695			0.129432093	0.009622282			0.068097616	0.001825794			-0.063938101	0.000554083	0.225479158	0.002204726					0.047285273	0.014442916	0.284406224	0.005173413
146	Luan et al., 2019; Luan et al., 2020	Manure substitution of chemical fertilizer affect soil microbial community diversity, structure and function in greenhouse vegetable production systems	China	39.22	117				NPK+manure	manure	COF	0-20			11.6	586	7.9	14.7		manure	upland	8	20.737	0.19	1.93E-06	0.28390135	0.000159616			0.241162057	0.009622282			0.146450931	0.002107821			-0.135034023	0.000773091	0.321806804	0.002251491					0.048790164	0.014442916	0.373141168	0.0038881
147	Luan et al., 2019; Luan et al., 2020	Manure substitution of chemical fertilizer affect soil microbial community diversity, structure and function in greenhouse vegetable production systems	China	39.22	117				NPK+manure	manure	COF	0-20			11.6	586	7.9	14.7		manure	upland	8	31.106	0.19	1.93E-06	0.411734721	0.000157188			0.304807322	0.009622282			0.335992735	0.001927774			-0.064939002	0.001010349	0.432766407	0.002827344					0.07540037	0.014442916	0.436528212	0.004659818
148	Chen et al., 2017	Changes in soil microbial community and organic carbon fractions under short-term straw return in a rice�Cwheat cropping system	China	30.87	112.83	5.3	59.7	35	NPK+plant residue	wheat and rice straw	COF	0-20			16.2	1140	5.88	18.91	1.95	plant residue	paddy	3	13			0.090779591	0.01856829													0.150720176	0.015766305			0.701125388	0.040145795			0.149877169	0.042483655
149	Chen et al., 2017	Changes in soil microbial community and organic carbon fractions under short-term straw return in a rice�Cwheat cropping system	China	31.02	119.43	22.7	64.2	13.1	NPK+plant residue	wheat and rice straw	COF	0-20			15.4	1328	5.54	15.58	1.25	plant residue	paddy	3	13			0.123732904	0.002094622													0.15017566	0.013862789			0.384796562	0.012972758			0.203696416	0.024920524
150	Chen et al., 2017	Changes in soil microbial community and organic carbon fractions under short-term straw return in a rice�Cwheat cropping system	China	32.4	120.08	44.7	46.4	8.9	NPK+plant residue	wheat and rice straw	COF	0-20			14.5	992	7.72	13.11	1.61	plant residue	paddy	3	14.5			0.14836846	0.014172308													0.324020737	0.047307459			0.746667206	0.061601379			0.421311653	0.092436562
151	Zhao et al., 2016	Changes in soil microbial community, enzyme activities and organic matter fractions under long-term straw return in north-central China	China	37.88	115.7				NPK+plant residue	maize straw	COF	0-20			12.4	550	8.7	6.67	0.83	plant residue	upland	30	2.25			0.184429039	0.000134601	0.206132205	0.000481896																			0.332705754	0.00377217
152	Zhao et al., 2016	Changes in soil microbial community, enzyme activities and organic matter fractions under long-term straw return in north-central China	China	37.88	115.7				NPK+plant residue	maize straw	COF	0-20			12.4	550	8.7	6.67	0.83	plant residue	upland	30	4.5			0.255524961	0.000107568	0.281639758	0.000441479																			0.451187357	0.008040876
153	Zhao et al., 2016	Changes in soil microbial community, enzyme activities and organic matter fractions under long-term straw return in north-central China	China	37.88	115.7				NPK+plant residue	maize straw	COF	0-20			12.4	550	8.7	6.67	0.83	plant residue	upland	30	9			0.340082349	0.000364674	0.334749583	0.000416494																			0.606135804	0.007243254
154	Guo et al., 2016	Tillage practices and straw-returning methods affect topsoil bacterial community and organic C under a rice-wheat cropping system in central China	China	29.85	115.55				NPK+plant residue	wheat and rice straw	COF	0-5			17.8	1361	4.79	16.89	2.2	plant residue	paddy	2				0.124626969	0.003504045													0.161859854	0.004970457			0.304860409	0.023733991			0.816910065	2.50E-05
155	Jangid et al., 2008	Relative impacts of land-use, management intensity and fertilization upon soil microbial community structure in agricultural systems	Ameica	33.9	-83.4				solid waste	poultry litter	OF	0-10			16.5	1250				solid waste	upland	14	4.5	1	0.000706187	0.15415068	0.024565382	0.36772478	0.012004773	0.033901552	0.009493108									0.361455167	0.001979969							0.312374685	0.001451615
156	Marschner et al., 2003	Structure and function of the soil microbial community in a long-term fertilizer experiment	Germany	50.9375	6.9603				NPK+plant residue		COF	0-20			10.4	751		1		plant residue	upland	31				0.043802623	0.00376835	-0.030771659	0.001384684													0.085766822	0.002192553	0.148420005	0.025101546
157	Marschner et al., 2003	Structure and function of the soil microbial community in a long-term fertilizer experiment	Germany	50.9375	6.9603				manure	manure	OF	0-20			10.4	751		1		manure	upland	31	5.2			0.177334015	0.004970518	0.114410351	0.001138582													0.0719735	0.002776506	0.207014169	0.0255706
158	Marschner et al., 2003	Structure and function of the soil microbial community in a long-term fertilizer experiment	Germany	50.9375	6.9603				sewage sludge	sewage sludge	OF	0-20			10.4	751		1		sewage sludge	upland	31	7.6			0.202026628	0.007282293	0.096228032	0.002512322													0.112795494	0.002716012	0.076961041	0.016543347
159	Ho et al., 2009	Effect of Different Fertilization Management Practices on Soil Microbial Activities and Community Structure in Volcanic Ash Citrus Orchard Soil	Korea	33.489	126.498				compost	compost	OF	0-10			15.3	1541				compost	upland	13	2	-0.3	0.000706307			0	0.009259259					-0.463991093	0.016017258			-0.470003629	0.125208333									0.064219593	0.021648535
160	Ho et al., 2009	Effect of Different Fertilization Management Practices on Soil Microbial Activities and Community Structure in Volcanic Ash Citrus Orchard Soil	Korea	33.489	126.498				NPK+compost	compost	COF	0-10			15.3	1541				compost	upland	13	2	-0.1	0.000682798			0	0					0.305927849	0.017762678			0.318453731	0.140194559									0.206682274	0.011455684
161	Ho et al., 2009	Effect of Different Fertilization Management Practices on Soil Microbial Activities and Community Structure in Volcanic Ash Citrus Orchard Soil	Korea	33.489	126.498				NPK+compost	compost	COF	0-10			15.3	1541				compost	upland	13	2	-0.3	0.00116927			0	0					-0.063254126	0.024518102			0.223143551	0.008541667									0.146835358	0.012964506
162	Datta et al., 2020	Bentonite-Based Organic Amendment Enriches Microbial Activity in Agricultural Soils	Czech Republic	49.98247778	17.00919722				NPK+manure	cattle manure	COF	0-25			7	705	5.13			manure	upland	3	50																	-0.031155168	0.002172335
163	Langer et al., 2014	Soil microbial diversity of four German long-term field experiments	Germany	51.3914	11.82	11.2	67.7	21.1	manure	farmyard manure	OF	0-20			9.4	482	7.2	15.1	1.7	manure	upland	100	13.5																	0.284884868	0.001088145							0.183802448	0.018389409
164	Langer et al., 2014	Soil microbial diversity of four German long-term field experiments	Germany	51.475	11.917	69	23	8	manure	farmyard manure	OF	0-20			9.7	452	6	12.9	1	manure	upland	124	13.5																	0.417441299	0.000771414							0.500705942	0.018389409
165	Rong et al., 2018	Soil microbial characteristics and yield response to partial substitution of chemical fertilizer with organic amendments in greenhouse vegetable production	China	38.13333333	114.3833333				NPK+manure	Pig manure	COF	0-20			11.5	540	8	5.28	0.0183	manure	upland	5	1.644			0.232348087	0.001162689													0.117783036	0.005665581			0.149587067	0.005118138			0.070072379	0.010483394
166	Rong et al., 2018	Soil microbial characteristics and yield response to partial substitution of chemical fertilizer with organic amendments in greenhouse vegetable production	China	38.13333333	114.3833333				NPK+manure	Pig manure	COF	0-20			11.5	540	8	5.28	0.0183	manure	upland	5	3.288			0.529928651	0.001307541													0.325998033	0.00528371			0.313734173	0.006691776			0.254893663	0.011136598
167	Rong et al., 2018	Soil microbial characteristics and yield response to partial substitution of chemical fertilizer with organic amendments in greenhouse vegetable production	China	38.13333333	114.3833333				NPK+manure plus plant residue	Pig manure+Straw	COF	0-20			11.5	540	8	5.28	0.0183	manure plus plant residue	upland	5	8.558			0.563570968	0.00145855													0.606135804	0.005251377			0.593744974	0.001674156			0.338780013	0.013964762
168	Rong et al., 2018	Soil microbial characteristics and yield response to partial substitution of chemical fertilizer with organic amendments in greenhouse vegetable production	China	38.13333333	114.3833333				NPK+plant residue	Straw	COF	0-20			11.5	540	8	5.28	0.0183	plant residue	upland	5	13.828			0.645116305	0.001559005													0.84729786	0.005268107			0.899416085	0.002396046			0.512440686	0.016103485
169	Tang et al., 2018	Impacts of long-term fertilization on the soil microbial communities in double-cropped paddy fields	China	28.11666667	112.3			13.7	NPK+plant residue	rice straw	COF	0-20			17.2	1553		29.4	2	plant residue	paddy	31	6.38																									0.142148689	0.000556083
170	Tang et al., 2018	Impacts of long-term fertilization on the soil microbial communities in double-cropped paddy fields	China	28.11666667	112.3			13.7	NPK+manure	low manure	COF	0-20			17.2	1553		29.4	2	manure	paddy	31	5.295																									0.370849526	0.000556324
171	Tang et al., 2018	Impacts of long-term fertilization on the soil microbial communities in double-cropped paddy fields	China	28.11666667	112.3			13.7	NPK+manure	high manure	COF	0-20			17.2	1553		29.4	2	manure	paddy	31	10.59																									0.122135514	0.000556367
172	Blancheta et al., 2016	Responses of soil properties and crop yields to different inorganic and organic amendments in a Swiss conventional farming system	Switzerland	46.40146667	6.235408333			34.5	plant residue	crop residues	OF	0-20			9.5	1004	7.3	20.3		plant residue	upland			-0.04	0.003331937	-0.00972455	0.005573939	-0.064887622	0.010264054			0	0.008666061			-0.014598799	0.001073284			-0.040739663	0.040051984							0.175545698	0.018389409
173	Blancheta et al., 2016	Responses of soil properties and crop yields to different inorganic and organic amendments in a Swiss conventional farming system	Switzerland	46.40146667	6.235408333			34.5	plant residue	crop residues	OF	0-20			9.5	1004	7.3	20.3		plant residue	upland			0.1	0.003331937	0.031748698	0.005573939	-0.042787275	0.010264054			-0.053488685	0.008666061			-0.036278187	0.001073284			0.153295567	0.029591663							0.219874285	0.018389409
174	Blancheta et al., 2016	Responses of soil properties and crop yields to different inorganic and organic amendments in a Swiss conventional farming system	Switzerland	46.40146667	6.235408333			34.5	manure	cattle farmyard manure	OF	0-20			9.5	1004	7.3	20.3		manure	upland		10	0.05	0.003331937	0.044171218	0.005573939	0.030930301	0.010264054			0	0.008666061			-0.059719235	0.001073284			0.166899858	0.018644306							0.233778972	0.018389409
175	Blancheta et al., 2016	Responses of soil properties and crop yields to different inorganic and organic amendments in a Swiss conventional farming system	Switzerland	46.40146667	6.235408333			34.5	manure	cattle farmyard manure	OF	0-20			9.5	1004	7.3	20.3		manure	upland		10	-0.14	0.003331937	0.050325084	0.005573939	0.020726131	0.010264054			0	0.008666061			-0.035652209	0.001073284			0.09331145	0.032443492							0.384423672	0.018389409
176	B?rjesson et al., 2012	Soil microbial community structure affected by 53 years of nitrogen fertilisation and different organic amendments	Swedish	60.36666667	18.08333333				NPK+plant residue	Straw	COF	0�C20			6.1	567	6.6		1.7	plant residue	upland	53		2.2	0.003331937	0.175632569	0.000165347																			0.146847169	0.088524197	0.400452566	0.033325254
177	B?rjesson et al., 2012	Soil microbial community structure affected by 53 years of nitrogen fertilisation and different organic amendments	Swedish	60.36666667	18.08333333				NPK+green manure	green manure	COF	0�C20			6.1	567	6.6		1.7	green manure	upland	53		1.9	0.003331937	0.208638865	0.000232663																			0.260506487	0.088054808	0.3801473	0.002034107
178	B?rjesson et al., 2012	Soil microbial community structure affected by 53 years of nitrogen fertilisation and different organic amendments	Swedish	60.36666667	18.08333333				NPK+manure	farmyard manure	COF	0�C20			6.1	567	6.6		1.7	manure	upland	53		2.3	0.003331937	0.569848964	0.000683357																			0.373687582	0.07963364	0.725130226	0.002492364
179	Ge et al., 2013	Microbial biomass, activity, and community structure in horticultural soils under conventional and organic management strategies	China	31.18333333	120.2833333			10.3	manure	Pig manure	OF	0-20			17.5	1225				manure	upland	6	40	-0.44	5.89E-05	0.62130779	3.20E-05	0.523946712	0.000387209											1.315391725	0.006749901	0.091974166	1.56E-05					1.060493331	0.000980459
180	Chang et al., 2014	Effects of long-term treatments of different organic fertilizers complemented with chemical N fertilizer on the chemical and biological properties of soils	China	24.03	120.69				compost	compost	OF	0-20			22.8	1677	5.3	12.5	1.1	compost	upland			0.7	0.003331937	0.079406778	0.005573939	0.083066599	0.010264054					0.771399377	0.018728126			0.228377643	0.017420247	0.534559589	0.00957825							0.416992613	0.018389409
181	Chang et al., 2014	Effects of long-term treatments of different organic fertilizers complemented with chemical N fertilizer on the chemical and biological properties of soils	China	24.03	120.69				NPK+compost	compost	COF	0-20			22.8	1677	5.3	12.5	1.1	compost	upland			0.5	0.003331937	0.079406778	0.005573939	0.061087692	0.010264054					0.963972863	0.018728126			0.27262763	0.017420247	0.639030355	0.00957825							0.396731428	0.018389409
182	Chang et al., 2014	Effects of long-term treatments of different organic fertilizers complemented with chemical N fertilizer on the chemical and biological properties of soils	China	24.03	120.69				NPK+compost	compost	COF	0-20			22.8	1677	5.3	12.5	1.1	compost	upland			0.3	0.003331937	0.064021859	0.005573939	0.023347364	0.010264054					0.920931111	0.018728126			0.259219608	0.017420247	0.602802332	0.00957825							0.178691789	0.018389409
183	Chang et al., 2014	Effects of long-term treatments of different organic fertilizers complemented with chemical N fertilizer on the chemical and biological properties of soils	China	24.03	120.69				NPK+green manure	green manure	COF	0-20			22.8	1677	5.3	12.5	1.1	green manure	upland			0.2	0.003331937	0.008230499	0.005573939	0.023347364	0.010264054					0.292756386	0.018728126			0.196554097	0.017420247	0.391378257	0.00957825							0.134074723	0.018389409
184	Chang et al., 2014	Effects of long-term treatments of different organic fertilizers complemented with chemical N fertilizer on the chemical and biological properties of soils	China	24.03	120.69				NPK+plant residue	peat	COF	0-20			22.8	1677	5.3	12.5	1.1	plant residue	upland			0.2	0.003331937	0.087011377	0.005573939	0.038614836	0.010264054					-0.843429384	0.018728126			0.10112415	0.017420247	0.463284679	0.00957825							0.083381609	0.018389409
185	K?tterera et al., 2014	Changes in organic carbon in topsoil and subsoil and microbial community composition caused by repeated additions of organic amendments and N fertilisation in a long-term field experiment in Sweden	Swedish	58.34	13.1				plant residue	grass hay	OF	12��22��			7.3	620	7.3	6.36		plant residue	upland	14		0.3	0.003331937	0.044016885	0.005573939																			-0.767255153	0.014442916	0.159221685	0.018389409
186	K?tterera et al., 2014	Changes in organic carbon in topsoil and subsoil and microbial community composition caused by repeated additions of organic amendments and N fertilisation in a long-term field experiment in Sweden	Swedish	58.34	13.1				manure	farmyard manure	OF	12��22��			7.3	620	7.3	6.36		manure	upland	14		0.4	0.003331937	0.135404637	0.005573939																			-0.559615788	0.014442916	0.175775862	0.018389409
187	K?tterera et al., 2014	Changes in organic carbon in topsoil and subsoil and microbial community composition caused by repeated additions of organic amendments and N fertilisation in a long-term field experiment in Sweden	Swedish	58.34	13.1				sewage sludge	sewage sludge	OF	12��22��			7.3	620	7.3	6.36		sewage sludge	upland	14		0	0.003331937	0.108854405	0.005573939																			0.068992871	0.014442916	0.304444706	0.018389409
188	K?tterera et al., 2014	Changes in organic carbon in topsoil and subsoil and microbial community composition caused by repeated additions of organic amendments and N fertilisation in a long-term field experiment in Sweden	Swedish	58.34	13.1				compost	domestic waste compost	OF	12��22��			7.3	620	7.3	6.36		compost	upland	14		0.3	0.003331937	0.207014169	0.005573939																			-0.693147181	0.014442916	0.131527607	0.018389409
189	Kirchmann et al., 2013	Properties of soils in the Swedish long-term fertility experiments: VII. Changes in topsoil and upper subsoil at ?rja and Fors after 50 years of nitrogen fertilization and manure application	Swedish	55.86666667	12.88333333				NPK+manure	famyard manure	COF	0-20			8.2	639				manure	upland	50				0.054558984	0.000745463													0.260929887	0.00957825							0.261256845	0.001484111
190	Tian et al., 2017	Response of soil organic matter fractions and composition of microbial community to long-term organic and mineral fertilization	China	36.9	120.7	52.1	28.7	19.2	manure	pig manure	OF	0-15			11.2	779	6.8	4.1	0.5	manure	upland	37	23.4	0.98	8.96E-06	0.813380769	2.84E-05	0.712691777	0.006606909	0.91794226	0.009622282																	0.293761119	0.004572174
191	Wang et al., 2017	Soil aggregation regulates distributions of carbon, microbial community and enzyme activities after 23-year manure amendment	China	30.41666667	120.2833333	42	38	20	NPK+compost	composted pig manure	COF	0-20			16.5	1050				compost	paddy	24	22.5			0.141970863	0.000809041	0.097433564	0.001251088																			0.370126399	0.013675991
192	Hol��k et al., 2019	Soil Microbial Communities and Enzyme Activities after Long-Term Application of Inorganic and Organic Fertilizers at Different Depths of the Soil Profile	Czech Republic	50.0875	14.29111111				manure	farmyard manure	OF	0-30			9.9	470	6.5			manure	upland	64	21	0.5	0.003331937			-0.013889112	0.010264054					-0.70014511	0.018728126			-0.172203427	0.017420247									0.14499031	0.002463885
193	Hol��k et al., 2019	Soil Microbial Communities and Enzyme Activities after Long-Term Application of Inorganic and Organic Fertilizers at Different Depths of the Soil Profile	Czech Republic	50.0875	14.29111111				NPK+manure	farmyard manure	COF	0-30			9.9	470	6.5			manure	upland	64	21	0.16	0.003331937			0.135254046	0.010264054					0.060870715	0.018728126			0.156569061	0.017420247									0.055186416	0.002305317
194	Stagnari et al., 2014	Long-term impact of farm management and crops on soil microorganisms assessed by combined DGGE and PLFA analyses	Italy	42.88333333	13.6				green manure		OF	0-10			13.9	742				green manure	upland	10		-0.1	0.003331937	0.232622295	0.005573939	0.318453731	0.010264054																			0.851538611	0.018389409
195	Moeskops et al., 2012	The impact of exogenous organic matter on SOM contents and microbial soil quality	Belgium	50.98333333	3.816666667	10.4	52.4	37.2	NPK+manure	cattle slurry	COF	0-20			10.6	763				manure	upland	6	77.38			0.174353387	0.000988082	0.190518324	0.001026156											0.294699666	0.012254696							0.186121016	0.023567163
196	Moeskops et al., 2012	The impact of exogenous organic matter on SOM contents and microbial soil quality	Belgium	50.98333333	3.816666667	10.4	52.4	37.2	NPK+manure	cattle farmyard manure	COF	0-20			10.6	763				manure	upland	6	65.33			0.273293335	0.002777071	0.249941744	0.002921054											0.259107077	0.02048053							0.116126583	0.026323875
197	Moeskops et al., 2012	The impact of exogenous organic matter on SOM contents and microbial soil quality	Belgium	50.98333333	3.816666667	10.4	52.4	37.2	NPK+compost	vegetable, fruit and garden waste compost	COF	0-20			10.6	763				compost	upland	6	22.3			0.329646272	0.002502824	0.36772478	0.003239512											0.342489055	0.013991402							0.212159916	0.027549704
198	Moeskops et al., 2012	The impact of exogenous organic matter on SOM contents and microbial soil quality	Belgium	50.98333333	3.816666667	10.4	52.4	37.2	NPK+compost	mostly woody, C rich materials farm compost	COF	0-20			10.6	763				compost	upland	6	56.01			0.182321557	0.000597758	0.127339422	0.001348085											0.156161162	0.017994851							0.222547545	0.038235074
199	Moeskops et al., 2012	The impact of exogenous organic matter on SOM contents and microbial soil quality	Belgium	50.98333333	3.816666667	10.4	52.4	37.2	NPK+compost	green, N rich materials farm compost	COF	0-20			10.6	763				compost	upland	6	67.06			0.266020576	0.001282988	0.268989939	0.001699909											0.237128068	0.014633122							0.026942604	0.023981463
200	Ngosong et al., 2010	The impact of farming practice on soil microorganisms and arbuscular mycorrhizal fungi: Crop type versus long-term mineral and organic fertilization	Germany	49	8	87	8	5	manure	cattle manure	OF	0-5			9.5	590				manure	upland	27
201	Ngosong et al., 2010	The impact of farming practice on soil microorganisms and arbuscular mycorrhizal fungi: Crop type versus long-term mineral and organic fertilization	Germany	49	8	87	8	5	manure	cattle manure	OF	0-5			9.5	590				manure	upland	27
202	Ngosong et al., 2010	The impact of farming practice on soil microorganisms and arbuscular mycorrhizal fungi: Crop type versus long-term mineral and organic fertilization	Germany	49	8	87	8	5	manure	cattle manure	OF	0-5			9.5	590				manure	upland	27
203	Cong et al., 2020	Effects and analysis of straw returning on subsoil microbial community structure in black soil	China	43.6	124.7166667				NPK+plant residue	maize straw	COF	20-40			5.6	594.8	5.94	11.4	1.02	plant residue	upland	4	15																									0.036240085	0.002767241
204	Cong et al., 2020	Effects and analysis of straw returning on subsoil microbial community structure in black soil	China	43.6	124.7166667				NPK+plant residue	maize straw	COF	20-40			5.6	594.8	5.94	11.4	1.02	plant residue	upland	4	75																									0.099629841	0.001225261
[truncated: 48 more columns]
